# Supplementary material
Source: MDPI journal article supplement (https://www.mdpi.com/2304-6740/10/11/184)
Supplement: s1 [file s1]

# Supplementary Material

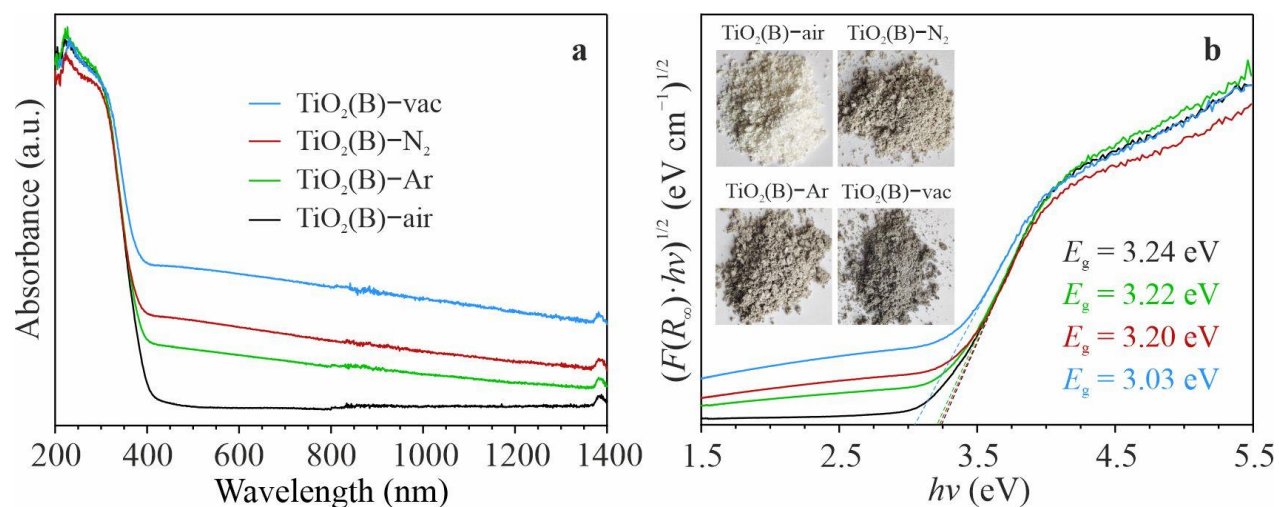

**Figure S1.** (a) UV-Vis-NIR absorption spectra for  $\text{TiO}_2(\text{B})$  samples prepared through the thermal treatment at 350 °C in different media (air, Ar,  $\text{N}_2$ , vacuum). (b) Evaluation of band gap (Tauc method) of studied products and photo of their appearance
